# Supplementary material for: Chrysophyllum cainito stem bark extract induces apoptosis in Human hepatocarcinoma HepG2 cells through ROS-mediated mitochondrial pathway
Source: PeerJ. 2020 Oct 16;8:e10168. doi: 10.7717/peerj.10168 (PMC7571409; doi:10.7717/peerj.10168)
Supplement: Supplemental Information 1 [file peerj-08-10168-s001.xlsx]

## Sheet: MTT HDFa cell
MTT fibroblast 2.10^4 cell/well/100 ul, 13/11/2017
	rep 1	rep 2	rep 3
CE (ug/ml)	% viability 1	% viability 2	% viability 3	ave	SEM
0	100	100	100	100	0		74.594	70.1651	77.9691
25	108.91	126.282	107.815	114.336	5.98152		81.2403	88.6059	84.0623
50	134.059	142.521	128.256	134.945	4.14173		100	100	100
100	87.92	105.972	85.771	93.221	6.40561		65.5831	74.3554	66.8748
200	33.861	36.752	42.284	37.6323	2.47103		25.2583	25.7871	32.9684
400	18.712	30.448	27.354	25.5047	3.51181		13.958	21.3639	21.3277
800	37.524	44.337	30.36	37.407	4.03524

## Sheet: MTT HepG2 cell
Viability	rep 1	rep 2	rep 3
extract ug/ml	% viability 1	% viability 2	% viability 3	average	SEM
0	100	100	100	100	0
25	96.3155	95.9459	94.7489	95.6701	0.472811
50	76.8279	77.6014	78.9193	77.7828	0.610536
100	52.1589	44.6959	49.8858	48.9136	2.20854
200	17.156	18.5135	34.3227	23.3307	5.50992
400	10.8233	13.3446	17.9985	14.0554	2.10158
800	12.3201	16.1149	20.3957	16.2769	2.33265

## Sheet: cell cycles
		% cell				threshold: 817-1172-1842
	A=SubG1					B: G0/G1					C: S					D:G2/M
	Control	CE 50 µg/ml	CE 75 µg/ml	CE 100 µg/ml		Control	CE 50 µg/ml	CE 75 µg/ml	CE 100 µg/ml		Control	CE 50 µg/ml	CE 75 µg/ml	CE 100 µg/ml		Control	CE 50 µg/ml	CE 75 µg/ml	CE 100 µg/ml
	6	15	39	45		54	42	22	26		32	26	23	20		8	5	12	11
	7	19	35	43		56	52	25	26		32	25	28	21		5	13	15	10
	8	12	38	46		54	55	24	26		33	27	27	18		5	6	11	11
	7	16	34	43		55	40	22	26		33	28	26	18		4	7	15	13
	8	19	45	42		54	54	26	24		28	26	22	19		6	13	11	14
Mean	7.2	16.2	38.2	43.8		54.6	48.6	23.8	25.6		31.6	26.4	25.2	19.2		5.6	8.8	12.8	11.8
SEM	0.374166	1.31909	1.93391	0.734847		0.4	3.15595	0.8	0.4		0.927362	0.509902	1.15758	0.583095		0.678233	1.74356	0.916515	0.734847

## Sheet: Apoptosis
	% cell	apoptosis, cell size 3-28, green threshold:1205, red threshold 1045
	apoptosis cell					live cell						death cell
	Control	CE 50 µg/ml	CE 70 µg/ml	CE 100 µg/ml		Control	CE 50 µg/ml	CE 70 µg/ml	CE 100 µg/ml			Control	CE 50 µg/ml	CE 70 µg/ml	CE 100 µg/ml
	1	5	9	15		93	71	47	28			6	24	45	56
	1	6	6	16		91	71	49	26			8	24	44	57
	1	6	12	16		90	69	45	30			9	26	44	53
	1	7	12	20		94	65	46	29			4	28	41	51
	1	4	12	20		94	83	45	33			4	13	44	47

## Sheet: ROS
	result of ROS treated 12 h measured on 19/12/2017
	RFU-blank						Reative fluorescence
CE (ug/ml)	0	50	75	100			0	50	75	100
rep 1	0.164	0.172	0.372	0.53		rep 1	1	1.04878	2.26829	3.23171
rep 2	0.128	0.151	0.249	0.38		rep 2	1	1.17969	1.94531	2.96875
rep 3	0.173	0.173	0.328	0.462		rep 3	1	1	1.89595	2.67052

## Sheet: Δψm
	MMP 25/03/2018, CE 12h, CCCP 50uM 1h, DiOC6 40 nM,30 min
	0	CE50	CE75	CE100	CCCP
Pre 1	1	0.895	0.923	0.853	0.79
Pre 2	1	0.934	0.925	0.809	0.761
Pre 3	1	0.96	0.928	0.868	0.755
	1	0.929667	0.925333	0.843333	0.768667
